# Supplementary material
Source: PubMed Central journal article supplement (PMC3366534)
Supplement: SD1.pdf [file SD1.pdf]

SUPPLEMENTAL TABLE 1

Microsatellite markers used for determination of MOI in the samples from the cohort study of 537 children on Pemba Island, Zanzibar, Tanzania\*

| Microsatellite marker | Chromosome | Repeat sequence | GenBank accession no.  | Allele length of positive control 3D7 in samples | Primer sequence. 5'→3' (internal forward and reverse primer) |
|-----------------------|------------|-----------------|------------------------|--------------------------------------------------|--------------------------------------------------------------|
| Ta81                  | 5          | TAA             | G38836;<br>AF166147-51 | 118                                              | F: TGGACAAATGGGAAAGGATA R: TTTCACACAACACAGGATT               |
| C4m8                  | 4          | TAA             | G37937                 | 146                                              | F: GATGATGAAAATAATAACAG R: GCAAATGAGCACAATCATTG              |
| Pfpk2                 | 12         | TTA             | G37852                 | 167                                              | F: AAAGAAGGAACAAGCAGA R: CTTTCATCGATACTACGA                  |

\*MOI = multiplicity of infection; F = forward; R = reverse.

SUPPLEMENTAL TABLE 2

Univariate conditional logistic regression with robust standard errors on anemia (hemoglobin &lt; 7 mg/dL), matched on date of presentation, in 120 cases and 556 controls on Pemba Island, Zanzibar, Tanzania\*

| Predictor                                                | No. cases (%) or mean (SD) | No. controls (%) or mean (SD) | OR (P)               | 95% CI           |
|----------------------------------------------------------|----------------------------|-------------------------------|----------------------|------------------|
| <b>Demographics, SES, and bed use (at enrollment)</b>    |                            |                               |                      |                  |
| <b>Age, months</b>                                       |                            |                               |                      |                  |
| 1–6                                                      | 15 (12.5)                  | 80 (14.3)                     | Reference            |                  |
| 7–12                                                     | 68 (56.6)                  | 217 (39.0)                    | <b>2.36 (0.003)</b>  | 1.27–4.38        |
| < 13                                                     | 37 (30.8)                  | 259 (46.5)                    | 0.94 (0.846)         | 0.49–1.81        |
| <b>Sex</b>                                               |                            |                               |                      |                  |
| F                                                        | 65 (54.1)                  | 274 (49.2)                    | Reference            |                  |
| M                                                        | 55 (45.8)                  | 282 (50.8)                    | <b>0.69 (0.037)</b>  | 0.49–0.98        |
| <b>Father's education</b>                                |                            |                               |                      |                  |
| Illiterate                                               | 59 (49.1)                  | 314 (56.4)                    | Reference            |                  |
| Primary                                                  | 43 (35.8)                  | 145 (26.1)                    | <b>1.74 (0.011)</b>  | 1.14–2.68        |
| Secondary                                                | 43 (35.8)                  | 97 (17.4)                     | 0.82 (0.497)         | 0.46–1.46        |
| <b>Mother's education</b>                                |                            |                               |                      |                  |
| Illiterate                                               | 45 (37.5)                  | 213 (38.3)                    | Reference            |                  |
| Primary                                                  | 29 (24.1)                  | 174 (31.2)                    | 0.86 (0.504)         | 0.54–1.35        |
| Secondary                                                | 46 (38.3)                  | 169 (30.3)                    | 0.80 (0.294)         | 0.52–1.22        |
| <b>Family income (\$/month)</b>                          |                            |                               |                      |                  |
| < 40                                                     | 48 (40)                    | 201 (36.1)                    | Reference            |                  |
| 40–100                                                   | 65 (54.1)                  | 317 (57)                      | <b>0.55 (0.005)</b>  | 0.46–0.84        |
| > 100                                                    | 7 (05.8)                   | 38 (06.8)                     | 0.51 (0.119)         | 0.22–1.19        |
| <b>Child used bed net†</b>                               |                            |                               |                      |                  |
| No                                                       | 75 (67.5)                  | 331 (67)                      | Reference            |                  |
| Yes                                                      | 36 (32.4)                  | 163 (33)                      | 0.85 (0.478)         | 0.56–1.32        |
| <b>Anthropometry at enrollment</b>                       |                            |                               |                      |                  |
| Arm circumference enrollment in cm‡                      | 12.8 (SD 1.16)             | 12.9 (SD 1.15)                | <b>0.85 (0.029)</b>  | <b>0.73–0.98</b> |
| Weight for height at enrollment z-score§                 | -0.16 (SD 1.15)            | -0.21 (SD 1.24)               | 0.91 (0.200)         | 0.80–1.05        |
| Weight for age at enrollment z-score¶                    | -1.03 (SD 1.19)            | -1.17 (SD 1.56)               | 0.95 (0.318)         | 0.85–1.05        |
| Height for age at enrollment z-score#                    | -1.03 (SD 0.95)            | -1.11 (SD 1.24)               | 0.9 (0.628)          | 0.84–1.11        |
| <b>Medical diagnosis at prior visit (-5 to -21 days)</b> |                            |                               |                      |                  |
| <b>Malaria (1–5,000 parasites) at prior visit**</b>      |                            |                               |                      |                  |
| No                                                       | 97 (85.1)                  | 461 (87.4)                    | Reference            |                  |
| Yes                                                      | 17 (14.9)                  | 66 (12.6)                     | 1.63 (0.094)         | 0.92–2.88        |
| <b>Malaria (density dependent) at prior visit††</b>      |                            |                               |                      |                  |
| No                                                       | 87 (76.3)                  | 442 (83.6)                    | Reference            |                  |
| Yes                                                      | 27 (23.7)                  | 87 (16.4)                     | <b>1.76 (0.024)</b>  | 1.08–2.89        |
| <b>Malaria (3 RDT) at prior visit‡‡</b>                  |                            |                               |                      |                  |
| No                                                       | 74 (64.9)                  | 404 (76.7)                    | Reference            |                  |
| Yes                                                      | 40 (35.1)                  | 123 (23.3)                    | <b>1.89 (0.003)</b>  | 1.23–2.87        |
| <b>Malaria (IMCI definition) at prior visit§§</b>        |                            |                               |                      |                  |
| No                                                       | 67 (63.2)                  | 335 (64.8)                    | Reference            |                  |
| Yes                                                      | 39 (36.8)                  | 182 (35.2)                    | 1.32 (0.156)         | 0.90–1.94        |
| <b>Pneumonia at prior visit¶¶</b>                        |                            |                               |                      |                  |
| No                                                       | 107 (93.8)                 | 511 (96.4)                    | Reference            |                  |
| Yes                                                      | 7 (6.2)                    | 19 (03.6)                     | <b>14.07 (0.001)</b> | 2.90–68.15       |
| <b>Bronchitis at prior visit##</b>                       |                            |                               |                      |                  |
| No                                                       | 112 (98.2)                 | 433 (96)                      | Reference            |                  |
| Yes                                                      | 2 (1.8)                    | 18 (4)                        | 0.52 (0.454)         | 0.96–2.84        |

(Continued)

SUPPLEMENTAL TABLE 2  
Continued

| Predictor                                                  | No. cases (%) or mean (SD) | No. controls (%) or mean (SD) | OR ( <i>P</i> )          | 95% CI     |
|------------------------------------------------------------|----------------------------|-------------------------------|--------------------------|------------|
| <b>Laboratory values</b>                                   |                            |                               |                          |            |
| <b>Gametocytes at prior visit***</b>                       |                            |                               |                          |            |
| No                                                         | 111 (97.3)                 | 515 (99.2)                    | Reference                |            |
| Yes                                                        | 3 (2.7)                    | 14 (0.8)                      | 0.76 (0.698)             | 0.19–3.01  |
| <b>Gametocytes at current visit</b>                        |                            |                               |                          |            |
| No                                                         | 114 (95)                   | 550 (98.9)                    | Reference                |            |
| Yes                                                        | 6 (5)                      | 6 (0.1)                       | <b>6.13 (0.001)</b>      | 2.04–18.43 |
| Parasite density at prior visit (log <sub>10</sub> /μL)††† | 2.1 (SD 1.7)               | 1.6 (SD 1.7)                  | <b>1.22 (&lt; 0.001)</b> | 1.09–1.37  |
| Parasite density at current visit (log <sub>10</sub> /μL)  | 2.1 (SD 1.9)               | 1.5 (SD 1.8)                  | <b>1.29 (&lt; 0.001)</b> | 1.15–1.45  |
| Leukocytes at prior visit (in 1,000)‡‡‡                    | 11.5 (SD 3.6)              | 10.7 (SD 3.3)                 | <b>1.08 (0.005)</b>      | 1.02–1.13  |
| <b>MOI (maximum of 3 MS markers), reduced dataset§§§</b>   |                            |                               |                          |            |
| <b>MOI = 4 at prior visit</b>                              |                            |                               |                          |            |
| 1                                                          | 29 (39.1)                  | 175 (40.5)                    | Reference                |            |
| 2                                                          | 22 (29.7)                  | 116 (26.8)                    | 1.39 (0.279)             | 0.77–2.52  |
| 3                                                          | 14 (18.9)                  | 62 (14.3)                     | 1.84 (0.115)             | 0.86–3.93  |
| ≥ 4                                                        | 9 (12.1)                   | 79 (18.2)                     | 0.60 (0.250)             | 0.25–1.44  |
| <b>MOI = 3 at prior visit</b>                              |                            |                               |                          |            |
| 1                                                          | 29 (39.1)                  | 175 (40.5)                    | Reference                |            |
| 2                                                          | 22 (29.7)                  | 116 (26.8)                    | 1.39 (0.276)             | 0.77–2.51  |
| ≥ 3                                                        | 23 (31)                    | 141 (32.5)                    | 1.08 (0.820)             | 0.55–2.14  |
| <b>MOI = 2 at prior visit</b>                              |                            |                               |                          |            |
| 1                                                          | 29 (39.1)                  | 175 (40.5)                    | Reference                |            |
| ≥ 2                                                        | 45 (60.9)                  | 257 (59.5)                    | 1.24 (0.451)             | 0.1–2.16   |
| <b>MOI = 4 at current visit</b>                            |                            |                               |                          |            |
| 1                                                          | 30 (38.9)                  | 128 (42.1)                    | Reference                |            |
| 2                                                          | 26 (33.7)                  | 128 (42.1)                    | <b>2.66 (0.005)</b>      | 1.35–5.25  |
| 3                                                          | 17 (22)                    | 46 (15.1)                     | 2.00 (0.114)             | 0.85–4.68  |
| ≥ 4                                                        | 4 (5.1)                    | 54 (17.7)                     | 0.82 (0.627)             | 0.38–1.79  |
| <b>MOI = 3 at current visit</b>                            |                            |                               |                          |            |
| 1                                                          | 30 (38.9)                  | 128 (42.1)                    | Reference                |            |
| 2                                                          | 26 (33.7)                  | 76 (25)                       | <b>2.70 (0.004)</b>      | 1.3–5.29   |
| ≥ 3                                                        | 21 (27.1)                  | 100 (32.8)                    | 1.34 (0.381)             | 0.70–2.55  |
| <b>MOI = 2 at current visit</b>                            |                            |                               |                          |            |
| 1                                                          | 30 (38.9)                  | 128 (42.1)                    | Reference                |            |
| ≥ 2                                                        | 47 (61.1)                  | 176 (57.9)                    | <b>1.86 (0.036)</b>      | 1.04–3.31  |

\*OR = odds ratio; CI = confidence interval; SES = socioeconomic status; RDT = rapid diagnostic test; IMCI = Integrated Management of Childhood Illness; MOI = multiplicity of infection; MS = microsatellite.

†Information on bed net use missing on 9 cases and 62 controls (7.5% of cases and 11.2% of controls).

‡Information on arm circumference at enrollment missing in 3 cases and 13 controls.

§Information on weight for height z-score at enrollment missing in 4 cases and 12 controls.

¶Information on weight for age z-score at enrollment missing in 4 cases and 10 controls.

#Information on height for age z-score at enrollment missing in 4 cases and 12 controls.

\*\*As per definition 1: ≥ 5,000 parasites/μL plus history of fever or documented fever. Information on previous malaria according to definition 1 was not available for the time window –5 to –21 days in 6 cases and 29 controls.

††As per definition 2: ≥ 1,000 parasites/μL plus documented fever; ≥ 3,000 plus history of fever; ≥ 8,000 regardless of fever. Information on previous malaria according to definition 2 was not available for the time window –5 to –21 days in 6 cases and 27 controls.

‡‡As per definition 3: ≥ any parasites plus history of fever or documented fever. This represents the performance of a rapid diagnostic test with a detection threshold of 50–100 parasites/μL. Information on previous malaria according to definition 3 was not available for the time window –5 to –21 days in 6 cases and 29 controls.

§§As per definition 4: any history of fever or documented fever regardless of parasites. This represents the IMCI definition of presumptive diagnosis of malaria. Information on previous malaria according to definition 4 was not available for the time window –5 to –21 days in 14 cases and 39 controls.

¶¶Information on previous pneumonia was not available for the time window –5 to –21 days in 6 cases and 26 controls.

#Information on previous bronchitis was not available for the time window –5 to –21 days in 6 cases and 26 controls.

\*\*\*Information on previous gametocytes was not available for the time window –5 to –21 days in 6 cases and 27 controls.

†††Information on previous parasite density was not available for the time window –5 to –21 days in 6 cases and 27 controls.

‡‡‡Information on previous leukocytes was not available for the time window –5 to –21 days in 10 cases and 104 controls.

§§§Information on MOI at previous visit (–5 to –21 days) was not available in 46 cases and 124 controls and for current visit in 43 cases and 252 controls.
